# Supplementary material for: De novo oviduct transcriptome of the moor frog Rana arvalis: a quest for maternal effect candidate genes
Source: PeerJ. 2018 Aug 16;6:e5452. doi: 10.7717/peerj.5452 (PMC6098945; doi:10.7717/peerj.5452)
Supplement: Supplemental Information 3 [file peerj-06-5452-s003.xlsx]

## Sheet: Sheet1
SI3. List of unigenes with SNP differentiation between the S and T population. We compared the homologous SNPs differentiated between population [S] (most acid sensitive) and population [T] (most acid tolerant) that differ in acid tolerance.
UnigeneID	SNP_POSI	Refbase	S1	S2	T1	T2	Annotation
CL10331.Contig2_All	1022	T	A	A	T	T	Gallus gallus aldo-keto reductase family 1, member B1-like (aldose reductase) (AKR1B1L), mRNA
CL10353.Contig2_All	3295	G	G	G	A	A	PREDICTED: Xenopus (Silurana) tropicalis cytospin-B-like (LOC100496397), mRNA
CL10447.Contig2_All	304	T	T	T	C	C	Pan troglodytes BAC clone CH251-709H11 from chromosome 7, complete sequence
CL10565.Contig2_All	221	G	G	G	A	A	Xenopus (Silurana) tropicalis microsomal glutathione S-transferase 2 (mgst2), mRNA
CL10803.Contig1_All	303	G	G	G	C	C	Rana grahami bradykinin precursor, gene, complete cds
CL10848.Contig1_All	295	C	G	G	C	C	Mimachlamys nobilis clone Cn213 microsatellite sequence
CL1114.Contig2_All	121	A	A	A	C	C	Zebrafish DNA sequence from clone CH211-252P3 in linkage group 6, complete sequence
CL1133.Contig2_All	674	G	A	A	G	G	Rana catesbeiana fast troponin I (TnIf) gene, promoter region, exons 1, 2 and partial cds
CL1185.Contig2_All	1230	G	A	A	G	G	Amolops tormotus clone Rato-1 microsatellite sequence
CL1279.Contig1_All	715	A	G	G	A	A	PREDICTED: Sarcophilus harrisii gametogenetin binding protein 2, transcript variant 2 (GGNBP2), mRNA
CL1279.Contig2_All	730	G	G	G	A	A	PREDICTED: Sarcophilus harrisii gametogenetin binding protein 2, transcript variant 2 (GGNBP2), mRNA
CL1376.Contig2_All	1648	G	C	C	G	G	Ictalurus punctatus inhibitor of apoptosis protein 1 gene, complete cds
CL1606.Contig1_All	142	T	A	A	T	T	Xenopus (Silurana) tropicalis ubiquitin-conjugating enzyme E2K (ube2k), mRNA >gi|49257783|gb|BC074688.1| Xenopus tropicalis ubiquitin-conjugating enzyme E2K (UBC1 homolog), mRNA (cDNA clone MGC:69258 IMAGE:5308135), complete cds
CL169.Contig1_All	310	C	A	A	C	C	Cyprinus carpio clone 533472 microsatellite sequence
CL1746.Contig2_All	1732	A	A	A	G	G	Xenopus laevis kinesin light chain 1 (klc1), mRNA >gi|28422197|gb|BC046850.1| Xenopus laevis kinesin 2, mRNA (cDNA clone MGC:53099 IMAGE:5542321), complete cds
CL1793.Contig3_All	2363	A	A	A	C	C	Xenopus (Silurana) tropicalis jumonji C domain containing histone demethylase 1 homolog D (jhdm1d), mRNA
CL2093.Contig2_All	913	G	A	A	G	G	Xenopus laevis phosphodiesterase 4A, cAMP-specific (pde4a), mRNA
CL21.Contig5_All	1320	T	C	C	T	T	Xenopus laevis glucosamine-6-phosphate deaminase 2 (gnpda2), mRNA >gi|38014746|gb|BC060461.1| Xenopus laevis Glucosamine-6-phosphate isomerase 2, mRNA (cDNA clone MGC:68593 IMAGE:4031849), complete cds
CL21.Contig7_All	1237	T	C	C	T	T	Xenopus laevis glucosamine-6-phosphate deaminase 2 (gnpda2), mRNA >gi|38014746|gb|BC060461.1| Xenopus laevis Glucosamine-6-phosphate isomerase 2, mRNA (cDNA clone MGC:68593 IMAGE:4031849), complete cds
CL2139.Contig12_All	224	A	G	G	A	A	Xenopus (Silurana) tropicalis X-box binding protein 1 (xbp1), mRNA >gi|45501098|gb|BC067321.1| Xenopus tropicalis X-box binding protein 1, mRNA (cDNA clone MGC:76163 IMAGE:5335429), complete cds
CL2324.Contig2_All	123	A	T	T	A	A	Rana temporaria microsatellite BFG082 sequence
CL2442.Contig2_All	734	G	A	A	G	G	PREDICTED: Xenopus (Silurana) tropicalis matrix-remodelling associated 7, transcript variant 2 (mxra7), mRNA
CL2634.Contig2_All	3067	T	A	A	T	T	Zebrafish DNA sequence from clone DKEY-204K5 in linkage group 17, complete sequence
CL2676.Contig1_All	531	G	G	G	A	A	Rana catesbeiana clone rcat-evr-536-373 ATP synthase subunit s, mitochondrial precursor putative mRNA, complete cds
CL2783.Contig2_All	256	C	G	G	C	C	PREDICTED: Xenopus (Silurana) tropicalis rho guanine nucleotide exchange factor 6-like (LOC100489192), mRNA
CL284.Contig2_All	706	G	A	A	G	G	Xenopus (Silurana) tropicalis CCAAT/enhancer binding protein (C/EBP), gamma (cebpg), mRNA >gi|134026185|gb|BC135823.1| Xenopus tropicalis CCAAT/enhancer binding protein (C/EBP), gamma, mRNA (cDNA clone MGC:122139 IMAGE:7627262), complete cds
CL284.Contig2_All	1218	C	C	C	T	T	Xenopus (Silurana) tropicalis CCAAT/enhancer binding protein (C/EBP), gamma (cebpg), mRNA >gi|134026185|gb|BC135823.1| Xenopus tropicalis CCAAT/enhancer binding protein (C/EBP), gamma, mRNA (cDNA clone MGC:122139 IMAGE:7627262), complete cds
CL284.Contig2_All	1442	T	G	G	T	T	Xenopus (Silurana) tropicalis CCAAT/enhancer binding protein (C/EBP), gamma (cebpg), mRNA >gi|134026185|gb|BC135823.1| Xenopus tropicalis CCAAT/enhancer binding protein (C/EBP), gamma, mRNA (cDNA clone MGC:122139 IMAGE:7627262), complete cds
CL284.Contig2_All	1447	T	C	C	T	T	Xenopus (Silurana) tropicalis CCAAT/enhancer binding protein (C/EBP), gamma (cebpg), mRNA >gi|134026185|gb|BC135823.1| Xenopus tropicalis CCAAT/enhancer binding protein (C/EBP), gamma, mRNA (cDNA clone MGC:122139 IMAGE:7627262), complete cds
CL2912.Contig1_All	5125	G	G	G	A	A	Xenopus laevis protein tyrosine phosphatase, receptor type, F (ptprf), mRNA >gi|7248658|gb|AF197945.1|AF197945 Xenopus laevis receptor protein tyrosine phosphatase LAR (XPTP-LAR) mRNA, complete cds
CL30.Contig2_All	92	A	A	A	C	C	Xenopus (Silurana) tropicalis uncharacterized LOC100145105 (LOC100145105), mRNA
CL3025.Contig1_All	916	C	C	C	A	A	Xenopus (Silurana) tropicalis chromosome 8 open reading frame 42 (c8orf42), mRNA >gi|77620821|emb|CR761669.2| Xenopus tropicalis finished cDNA, clone TGas051p20
CL311.Contig2_All	371	C	C	C	T	T	PREDICTED: Nomascus leucogenys solute carrier family 38, member 10 (SLC38A10), mRNA
CL3311.Contig4_All	4269	T	T	T	C	C	PREDICTED: Xenopus (Silurana) tropicalis protein FAM13A-like (LOC100488957), mRNA
CL3354.Contig1_All	3913	C	T	T	C	C	TSA: Anolis carolinensis k81_950878 transcribed RNA sequence
CL3354.Contig2_All	1703	A	A	A	G	G	PREDICTED: Xenopus (Silurana) tropicalis latrophilin-2-like (LOC100494313), mRNA
CL3370.Contig1_All	386	T	A	A	T	T	PREDICTED: Xenopus (Silurana) tropicalis protein QN1 homolog (LOC100497718), mRNA
CL3495.Contig2_All	194	T	C	C	T	T	PREDICTED: Loxodonta africana epoxide hydrolase 1, microsomal (xenobiotic) (EPHX1), mRNA
CL3552.Contig2_All	2227	A	G	G	A	A	PREDICTED: Xenopus (Silurana) tropicalis hypothetical protein LOC100493212 (LOC100493212), mRNA
CL3552.Contig2_All	2636	C	C	C	G	G	PREDICTED: Xenopus (Silurana) tropicalis hypothetical protein LOC100493212 (LOC100493212), mRNA
CL3552.Contig2_All	2698	T	T	T	C	C	PREDICTED: Xenopus (Silurana) tropicalis hypothetical protein LOC100493212 (LOC100493212), mRNA
CL3802.Contig2_All	714	T	T	T	G	G	Xenopus laevis GRAM domain containing 1C (gramd1c), mRNA
CL4000.Contig1_All	98	G	T	T	G	G	PREDICTED: Saccoglossus kowalevskii protease, serine, 7 (enterokinase)-like (LOC100374298), mRNA
CL4000.Contig1_All	104	T	C	C	T	T	PREDICTED: Saccoglossus kowalevskii protease, serine, 7 (enterokinase)-like (LOC100374298), mRNA
CL4000.Contig1_All	1481	G	G	G	T	T	PREDICTED: Saccoglossus kowalevskii protease, serine, 7 (enterokinase)-like (LOC100374298), mRNA
CL4000.Contig1_All	1532	T	T	T	C	C	PREDICTED: Saccoglossus kowalevskii protease, serine, 7 (enterokinase)-like (LOC100374298), mRNA
CL4000.Contig1_All	1763	G	G	G	A	A	PREDICTED: Saccoglossus kowalevskii protease, serine, 7 (enterokinase)-like (LOC100374298), mRNA
CL4179.Contig2_All	1680	C	A	A	C	C	Xenopus (Silurana) tropicalis RAB35, member RAS oncogene family (rab35), mRNA >gi|38174139|gb|BC061434.1| Xenopus tropicalis RAB35, member RAS oncogene family, mRNA (cDNA clone MGC:76044 IMAGE:5385045), complete cds
CL4276.Contig4_All	3378	A	A	A	T	T	PREDICTED: Xenopus (Silurana) tropicalis GTPase-activating Rap/Ran-GAP domain-like protein 3-like (LOC100486787), partial mRNA
CL4327.Contig1_All	286	G	G	G	T	T	Xenopus (Silurana) tropicalis eukaryotic translation initiation factor 2 alpha kinase 4 (eif2ak4), mRNA
CL4327.Contig2_All	238	C	T	T	C	C	Xenopus (Silurana) tropicalis eukaryotic translation initiation factor 2 alpha kinase 4 (eif2ak4), mRNA
CL4327.Contig2_All	631	A	G	G	A	A	Xenopus (Silurana) tropicalis eukaryotic translation initiation factor 2 alpha kinase 4 (eif2ak4), mRNA
CL4327.Contig2_All	1102	A	G	G	A	A	Xenopus (Silurana) tropicalis eukaryotic translation initiation factor 2 alpha kinase 4 (eif2ak4), mRNA
CL4327.Contig2_All	1481	A	C	C	A	A	Xenopus (Silurana) tropicalis eukaryotic translation initiation factor 2 alpha kinase 4 (eif2ak4), mRNA
CL444.Contig1_All	440	A	C	C	A	A	Rana grahami bradykinin precursor, gene, complete cds
CL4451.Contig1_All	934	C	C	C	G	G	Xenopus tropicalis finished cDNA, clone TGas142f10
CL4451.Contig1_All	1021	A	A	A	G	G	Xenopus tropicalis finished cDNA, clone TGas142f10
CL467.Contig1_All	241	T	T	T	C	C	Rana rugosa got1 gene for glutamate oxaloacetate transaminase, partial cds
CL4702.Contig1_All	1316	G	G	G	A	A	Xenopus tropicalis finished cDNA, clone TNeu120e23
CL4723.Contig1_All	646	A	A	A	G	G	Rana catesbeiana smooth muscle alpha actin gene, complete cds
CL4733.Contig1_All	1831	A	G	G	A	A	PREDICTED: Xenopus (Silurana) tropicalis protein phosphatase 1, regulatory (inhibitor) subunit 13B, transcript variant 2 (ppp1r13b), mRNA
CL4733.Contig1_All	1950	T	G	G	T	T	PREDICTED: Xenopus (Silurana) tropicalis protein phosphatase 1, regulatory (inhibitor) subunit 13B, transcript variant 2 (ppp1r13b), mRNA
CL4858.Contig1_All	585	C	C	C	G	G	PREDICTED: Xenopus (Silurana) tropicalis ubiquitin carboxyl-terminal hydrolase L5 (uchl5), mRNA
CL4858.Contig2_All	117	G	A	A	G	G	PREDICTED: Xenopus (Silurana) tropicalis ubiquitin carboxyl-terminal hydrolase L5 (uchl5), mRNA
CL4858.Contig2_All	154	T	G	G	T	T	PREDICTED: Xenopus (Silurana) tropicalis ubiquitin carboxyl-terminal hydrolase L5 (uchl5), mRNA
CL4858.Contig2_All	1000	T	C	C	T	T	PREDICTED: Xenopus (Silurana) tropicalis ubiquitin carboxyl-terminal hydrolase L5 (uchl5), mRNA
CL4892.Contig2_All	925	A	A	A	G	G	PREDICTED: Xenopus (Silurana) tropicalis neurabin-1-like (LOC100496337), mRNA
CL5250.Contig1_All	1660	C	A	A	C	C	Xenopus (Silurana) tropicalis mediator complex subunit 25 (med25), mRNA
CL5382.Contig1_All	479	G	G	G	C	C	Mouse DNA sequence from clone RP24-144L17 on chromosome 14, complete sequence
CL5440.Contig1_All	2328	G	T	T	G	G	Xenopus (Silurana) tropicalis laminin, gamma 1 (lamc1), mRNA >gi|117558098|gb|BC127297.1| Xenopus tropicalis laminin, gamma 1, mRNA (cDNA clone MGC:145717 IMAGE:7793026), complete cds
CL5440.Contig1_All	3473	T	T	T	C	C	Xenopus (Silurana) tropicalis laminin, gamma 1 (lamc1), mRNA >gi|117558098|gb|BC127297.1| Xenopus tropicalis laminin, gamma 1, mRNA (cDNA clone MGC:145717 IMAGE:7793026), complete cds
CL5440.Contig1_All	4761	T	T	T	G	G	Xenopus (Silurana) tropicalis laminin, gamma 1 (lamc1), mRNA >gi|117558098|gb|BC127297.1| Xenopus tropicalis laminin, gamma 1, mRNA (cDNA clone MGC:145717 IMAGE:7793026), complete cds
CL5502.Contig3_All	2753	C	C	C	A	A	Xenopus (Silurana) tropicalis glycerophosphocholine phosphodiesterase GDE1 homolog (gpcpd1), mRNA >gi|197246653|gb|BC168443.1| Xenopus tropicalis cDNA clone MGC:135840 IMAGE:7709909, complete cds
CL5580.Contig2_All	1015	A	C	C	A	A	PREDICTED: Ornithorhynchus anatinus tenascin-N-like (LOC100084954), mRNA
CL5582.Contig2_All	308	T	T	T	A	A	Rana rugosa got1 gene for glutamate oxaloacetate transaminase, partial cds
CL5582.Contig2_All	575	T	T	T	C	C	Rana rugosa got1 gene for glutamate oxaloacetate transaminase, partial cds
CL5582.Contig3_All	1030	A	A	A	T	T	Rana rugosa got1 gene for glutamate oxaloacetate transaminase, partial cds
CL5592.Contig2_All	343	C	T	T	C	C	PREDICTED: Xenopus (Silurana) tropicalis mitochondrial import receptor subunit TOM40B-like (LOC100496551), mRNA
CL5592.Contig2_All	609	G	G	G	A	A	PREDICTED: Xenopus (Silurana) tropicalis mitochondrial import receptor subunit TOM40B-like (LOC100496551), mRNA
CL5649.Contig2_All	1009	T	T	T	A	A	Rana grahami bradykinin precursor, gene, complete cds
CL5865.Contig3_All	407	C	T	T	C	C	PREDICTED: Nomascus leucogenys aspartyl-tRNA synthetase 2, mitochondrial (DARS2), mRNA
CL6095.Contig3_All	2559	A	G	G	A	A	Xenopus (Silurana) tropicalis zinc finger, MIZ-type containing 1 (zmiz1), mRNA >gi|195540166|gb|BC168031.1| Xenopus tropicalis cDNA clone MGC:185235 IMAGE:7793374, complete cds
CL6748.Contig2_All	42	G	G	G	A	A	Equus caballus microsatellite DNA, locus ABGe13915
CL6767.Contig1_All	290	G	A	A	G	G	Xenopus laevis nectin-2beta (LOC100505446), mRNA >gi|292606970|gb|GU290316.1| Xenopus laevis clone XL219e23 nectin-2beta mRNA, complete cds
CL7136.Contig1_All	1918	C	C	C	A	A	Rana temporaria microsatellite RtR sequence
CL757.Contig2_All	662	C	C	C	T	T	Xenopus laevis RAB27A, member RAS oncogene family (rab27a-b), mRNA
CL7661.Contig5_All	225	G	G	G	T	T	Rana grahami bradykinin precursor, gene, complete cds
CL7742.Contig1_All	288	A	A	A	G	G	Xenopus laevis MGC80416 protein (MGC80416), mRNA >gi|49115111|gb|BC072924.1| Xenopus laevis MGC80416 protein, mRNA (cDNA clone MGC:80416 IMAGE:5155136), complete cds
CL7898.Contig1_All	2300	A	G	G	A	A	Plasmodium knowlesi strain H chromosome 8, complete genome
CL7898.Contig4_All	39	A	C	C	A	A	Rana okaloosae clone 219 microsatellite sequence
CL8207.Contig2_All	412	A	A	A	C	C	Zebrafish DNA sequence from clone DKEY-126D11 in linkage group 7, complete sequence
CL8390.Contig2_All	585	A	A	A	C	C	PREDICTED: Gallus gallus dynein heavy chain 5, axonemal-like (LOC428510), mRNA
CL8390.Contig2_All	1250	A	A	A	G	G	PREDICTED: Gallus gallus dynein heavy chain 5, axonemal-like (LOC428510), mRNA
CL8402.Contig1_All	957	T	T	T	G	G	Rana temporaria microsatellite BFG082 sequence
CL8402.Contig1_All	1239	T	T	T	C	C	Rana temporaria microsatellite BFG082 sequence
CL8722.Contig2_All	77	T	A	A	T	T	Xenopus laevis TIP41, TOR signaling pathway regulator-like (tiprl), mRNA >gi|47507493|gb|BC070992.1| Xenopus laevis TIP41-like, mRNA (cDNA clone MGC:79019 IMAGE:4408037), complete cds
CL8782.Contig2_All	610	G	T	T	G	G	PREDICTED: Xenopus (Silurana) tropicalis laminin subunit gamma-2-like (LOC100489162), mRNA
CL8876.Contig8_All	736	C	T	T	C	C	PREDICTED: Xenopus (Silurana) tropicalis protein phosphatase 1, regulatory (inhibitor) subunit 13B, transcript variant 1 (ppp1r13b), mRNA
CL8876.Contig8_All	1078	C	C	C	T	T	PREDICTED: Xenopus (Silurana) tropicalis protein phosphatase 1, regulatory (inhibitor) subunit 13B, transcript variant 1 (ppp1r13b), mRNA
CL8981.Contig1_All	1512	A	A	A	T	T	Xenopus (Silurana) tropicalis actin-like 6A (actl6a), mRNA >gi|39850283|gb|BC064183.1| Xenopus tropicalis actin-like 6A, mRNA (cDNA clone MGC:75671 IMAGE:5379983), complete cds
CL9082.Contig1_All	104	A	G	G	A	A	Rana catesbeiana fast troponin I (TnIf) gene, promoter region, exons 1, 2 and partial cds
CL9131.Contig1_All	84	T	T	T	C	C	Mus musculus BAC clone RP24-174N6 from chromosome 15, complete sequence
CL9210.Contig3_All	535	A	G	G	A	A	Amolops tormotus clone Rato-8 microsatellite sequence
CL9210.Contig3_All	636	C	G	G	C	C	Amolops tormotus clone Rato-8 microsatellite sequence
CL9768.Contig2_All	436	G	A	A	G	G	PREDICTED: Sarcophilus harrisii RNA polymerase II associated protein 2 (RPAP2), mRNA
CL9864.Contig2_All	1465	T	C	C	T	T	Xenopus laevis IQ motif containing B1 (iqcb1), mRNA
Unigene10286_All	1158	T	T	T	A	A	Xenopus (Silurana) tropicalis transmembrane BAX inhibitor motif containing 1 (tmbim1), mRNA >gi|62201901|gb|BC092551.1| Xenopus tropicalis MGC107973 protein, mRNA (cDNA clone MGC:107973 IMAGE:7025630), complete cds
Unigene10286_All	1205	C	C	C	T	T	Xenopus (Silurana) tropicalis transmembrane BAX inhibitor motif containing 1 (tmbim1), mRNA >gi|62201901|gb|BC092551.1| Xenopus tropicalis MGC107973 protein, mRNA (cDNA clone MGC:107973 IMAGE:7025630), complete cds
Unigene10289_All	616	T	C	C	T	T	Xenopus (Silurana) tropicalis actin-like 6A (actl6a), mRNA >gi|39850283|gb|BC064183.1| Xenopus tropicalis actin-like 6A, mRNA (cDNA clone MGC:75671 IMAGE:5379983), complete cds
Unigene1054_All	160	G	G	G	A	A	Rana catesbeiana smooth muscle alpha actin gene, complete cds
Unigene1054_All	404	C	C	C	T	T	Rana catesbeiana smooth muscle alpha actin gene, complete cds
Unigene10671_All	934	A	C	C	A	A	Rana catesbeiana smooth muscle alpha actin gene, complete cds
Unigene10832_All	2063	C	A	A	C	C	Xenopus tropicalis MARVEL (membrane-associating) domain containing 2, mRNA (cDNA clone MGC:146900 IMAGE:7870293), complete cds
Unigene10832_All	2074	T	C	C	T	T	Xenopus tropicalis MARVEL (membrane-associating) domain containing 2, mRNA (cDNA clone MGC:146900 IMAGE:7870293), complete cds
Unigene10832_All	2080	A	G	G	A	A	Xenopus tropicalis MARVEL (membrane-associating) domain containing 2, mRNA (cDNA clone MGC:146900 IMAGE:7870293), complete cds
Unigene1092_All	724	G	G	G	A	A	Xenopus laevis catenin, beta interacting protein 1 a, mRNA (cDNA clone MGC:84661 IMAGE:6944760), complete cds
Unigene10940_All	407	T	T	T	C	C	Rana temporaria microsatellite BFG095 sequence
Unigene11065_All	404	A	C	C	A	A	PREDICTED: Monodelphis domestica F-box and WD repeat domain containing 11 (FBXW11), mRNA
Unigene11178_All	470	A	A	A	T	T	Rana temporaria microsatellite BFG082 sequence
Unigene11285_All	234	G	G	G	A	A	Xenopus (Silurana) tropicalis ARP2 actin-related protein 2 homolog (actr2), mRNA >gi|60618406|gb|BC090611.1| Xenopus tropicalis ARP2 actin-related protein 2 homolog, mRNA (cDNA clone MGC:69469 IMAGE:5336079), complete cds
Unigene11430_All	494	G	G	G	T	T	Rana grahami bradykinin precursor, gene, complete cds
Unigene11459_All	3185	G	C	C	G	G	Buergeria buergeri CLSTN1 mRNA for calsyntenin 1, partial cds
Unigene11549_All	1063	A	G	G	A	A	Rana temporaria microsatellite BFG006 sequence
Unigene11583_All	335	A	C	C	A	A	Rana esculenta clone Re2Caga3 microsatellite sequence
Unigene11931_All	81	A	A	A	C	C	Rana rugosa got1 gene for glutamate oxaloacetate transaminase, partial cds
Unigene11931_All	490	G	A	A	G	G	Rana rugosa got1 gene for glutamate oxaloacetate transaminase, partial cds
Unigene11931_All	601	A	A	A	C	C	Rana rugosa got1 gene for glutamate oxaloacetate transaminase, partial cds
Unigene11931_All	910	G	A	A	G	G	Rana rugosa got1 gene for glutamate oxaloacetate transaminase, partial cds
Unigene1218_All	276	A	A	A	G	G	Mus musculus RRP9, small subunit (SSU) processome component, homolog (yeast), mRNA (cDNA clone MGC:25949 IMAGE:4237895), complete cds
Unigene13323_All	402	G	G	G	A	A	Rana temporaria microsatellite BFG101 sequence
Unigene13323_All	411	A	A	A	G	G	Rana temporaria microsatellite BFG101 sequence
Unigene13323_All	989	T	T	T	C	C	Rana temporaria microsatellite BFG101 sequence
Unigene13323_All	1047	T	T	T	A	A	Rana temporaria microsatellite BFG101 sequence
Unigene13323_All	1075	C	C	C	T	T	Rana temporaria microsatellite BFG101 sequence
Unigene13323_All	1111	C	C	C	T	T	Rana temporaria microsatellite BFG101 sequence
Unigene13367_All	1998	C	C	C	T	T	Agkistrodon contortrix clone E33DIFJ02JUJA1 microsatellite sequence
Unigene13516_All	1712	T	T	T	A	A	Xenopus laevis exocyst complex component 7 (exoc7), mRNA
Unigene13569_All	287	G	T	T	G	G	Xenopus (Silurana) tropicalis chromosome 15 open reading frame 26 (c15orf26), mRNA
Unigene13578_All	466	T	T	T	C	C	Rana chensinensis clone RCMS015 microsatellite sequence
Unigene13578_All	802	T	T	T	G	G	Rana chensinensis clone RCMS015 microsatellite sequence
Unigene13760_All	174	C	A	A	C	C	Rana catesbeiana smooth muscle alpha actin gene, complete cds
Unigene13760_All	183	C	T	T	C	C	Rana catesbeiana smooth muscle alpha actin gene, complete cds
Unigene14254_All	4203	A	C	C	A	A	Rana temporaria microsatellite BFG128 sequence
Unigene14529_All	2747	C	A	A	C	C	Rana catesbeiana cardiac troponin I (TnIc) gene, promoter region, 5' UTR, and exon 1
Unigene1458_All	131	C	C	C	T	T	Rana rugosa got1 gene for glutamate oxaloacetate transaminase, partial cds
Unigene14625_All	616	G	A	A	G	G	Xenopus (Silurana) tropicalis grainyhead-like 2 (grhl2), mRNA >gi|56788813|gb|BC088489.1| Xenopus tropicalis grainyhead-like 2, mRNA (cDNA clone MGC:97535 IMAGE:5383205), complete cds
Unigene14799_All	46	G	A	A	G	G	Rana grahami bradykinin precursor, gene, complete cds
Unigene14877_All	203	T	A	A	T	T	Rana dybowskii 17-alpha-hydroxylase/17,20 lyase (CYP17) mRNA, complete cds
Unigene15268_All	446	A	T	T	A	A	Acipenser baerii transposon TC1-like, complete sequence
Unigene15423_All	497	G	G	G	A	A	Rana nigromaculata clone rnh-1 microsatellite sequence
Unigene15423_All	632	A	A	A	G	G	Rana nigromaculata clone rnh-1 microsatellite sequence
Unigene15498_All	3742	T	C	C	T	T	Xenopus laevis v-erb-b2 erythroblastic leukemia viral oncogene homolog 2, neuro/glioblastoma derived oncogene homolog (erbb2), mRNA >gi|109631105|gb|DQ646917.1| Xenopus laevis receptor tyrosine kinase ErbB2 (erbb2) mRNA, complete cds
Unigene15498_All	3860	G	T	T	G	G	Xenopus laevis v-erb-b2 erythroblastic leukemia viral oncogene homolog 2, neuro/glioblastoma derived oncogene homolog (erbb2), mRNA >gi|109631105|gb|DQ646917.1| Xenopus laevis receptor tyrosine kinase ErbB2 (erbb2) mRNA, complete cds
Unigene15498_All	4264	A	A	A	G	G	Xenopus laevis v-erb-b2 erythroblastic leukemia viral oncogene homolog 2, neuro/glioblastoma derived oncogene homolog (erbb2), mRNA >gi|109631105|gb|DQ646917.1| Xenopus laevis receptor tyrosine kinase ErbB2 (erbb2) mRNA, complete cds
Unigene15563_All	666	G	G	G	A	A	Rattus norvegicus Y Chr BAC RNECO-178I04 (Amplicon Express Rat SHR-Akr (EcoR1 Digest) BAC library) complete sequence
Unigene16107_All	456	G	G	G	A	A	PREDICTED: Ornithorhynchus anatinus transformation/transcription domain-associated protein, transcript variant 2 (TRRAP), mRNA
Unigene16419_All	1058	G	G	G	T	T	PREDICTED: Sarcophilus harrisii proteasome (prosome, macropain) 26S subunit, ATPase, 2 (PSMC2), mRNA
Unigene16564_All	1037	A	A	A	G	G	Gallus gallus finished cDNA, clone ChEST1016c1
Unigene16734_All	185	T	T	T	C	C	TSA: Anolis carolinensis comp5592_c1_seq4 transcribed RNA sequence
Unigene17644_All	225	A	T	T	A	A	Rana temporaria microsatellite BFG037 sequence
Unigene18086_All	102	T	C	C	T	T	TSA: Anolis carolinensis k46:7489366 transcribed RNA sequence
Unigene18086_All	158	T	C	C	T	T	TSA: Anolis carolinensis k46:7489366 transcribed RNA sequence
Unigene18086_All	191	G	A	A	G	G	TSA: Anolis carolinensis k46:7489366 transcribed RNA sequence
Unigene18086_All	323	T	C	C	T	T	TSA: Anolis carolinensis k46:7489366 transcribed RNA sequence
Unigene18108_All	664	A	A	A	C	C	Salmo salar clone BAC CHORI214-109F19 complete sequence
Unigene18191_All	128	G	G	G	T	T	Rana temporaria microsatellite BFG059 sequence
Unigene19847_All	155	T	T	T	C	C	PREDICTED: Xenopus (Silurana) tropicalis e3 ubiquitin/ISG15 ligase TRIM25-like (LOC100495568), partial mRNA
Unigene19932_All	220	A	C	C	A	A	Rana dalmatina microsatellite Radal-H1 sequence
Unigene20357_All	4170	G	T	T	G	G	PREDICTED: Xenopus (Silurana) tropicalis rapamycin-insensitive companion of mTOR-like (LOC100485588), mRNA
Unigene20372_All	3027	C	C	C	A	A	PREDICTED: Xenopus (Silurana) tropicalis interferon-induced very large GTPase 1-like (LOC100492630), mRNA
Unigene20372_All	3515	C	C	C	T	T	PREDICTED: Xenopus (Silurana) tropicalis interferon-induced very large GTPase 1-like (LOC100492630), mRNA
Unigene20372_All	4467	A	A	A	G	G	PREDICTED: Xenopus (Silurana) tropicalis interferon-induced very large GTPase 1-like (LOC100492630), mRNA
Unigene20372_All	4476	A	A	A	G	G	PREDICTED: Xenopus (Silurana) tropicalis interferon-induced very large GTPase 1-like (LOC100492630), mRNA
Unigene20433_All	2998	A	A	A	T	T	Xenopus (Silurana) tropicalis HEAT repeat containing 5B (heatr5b), mRNA
Unigene20466_All	1012	C	C	C	T	T	PREDICTED: Xenopus (Silurana) tropicalis carnitine O-palmitoyltransferase 1, liver isoform-like (LOC100490391), partial mRNA
Unigene20466_All	1812	T	T	T	G	G	PREDICTED: Xenopus (Silurana) tropicalis carnitine O-palmitoyltransferase 1, liver isoform-like (LOC100490391), partial mRNA
Unigene20491_All	74	G	G	G	A	A	Zebrafish DNA sequence from clone DKEYP-55F12 in linkage group 20, complete sequence
Unigene20491_All	104	G	G	G	A	A	Zebrafish DNA sequence from clone DKEYP-55F12 in linkage group 20, complete sequence
Unigene20491_All	109	T	T	T	A	A	Zebrafish DNA sequence from clone DKEYP-55F12 in linkage group 20, complete sequence
Unigene20491_All	734	T	T	T	C	C	Zebrafish DNA sequence from clone DKEYP-55F12 in linkage group 20, complete sequence
Unigene20492_All	742	T	T	T	C	C	Zebrafish DNA sequence from clone DKEYP-55F12 in linkage group 20, complete sequence
Unigene20492_All	1037	T	T	T	C	C	Zebrafish DNA sequence from clone DKEYP-55F12 in linkage group 20, complete sequence
Unigene20492_All	1274	G	G	G	A	A	Zebrafish DNA sequence from clone DKEYP-55F12 in linkage group 20, complete sequence
Unigene20492_All	1322	T	T	T	C	C	Zebrafish DNA sequence from clone DKEYP-55F12 in linkage group 20, complete sequence
Unigene20495_All	94	T	T	T	C	C	Xenopus (Silurana) tropicalis kinesin-associated protein 3 (kifap3), mRNA
Unigene20641_All	579	C	T	T	C	C	PREDICTED: Xenopus (Silurana) tropicalis serine/threonine-protein phosphatase 2A regulatory subunit B'' subunit alpha-like (LOC100494129), mRNA
Unigene20645_All	300	T	T	T	A	A	PREDICTED: Tursiops truncatus Rho guanine nucleotide exchange factor (GEF) 37 (ARHGEF37), mRNA
Unigene20645_All	705	T	G	G	T	T	PREDICTED: Tursiops truncatus Rho guanine nucleotide exchange factor (GEF) 37 (ARHGEF37), mRNA
Unigene20738_All	1273	A	A	A	T	T	Mus musculus adaptor-related protein complex AP-4, epsilon 1 (Ap4e1), mRNA
Unigene20738_All	1442	C	C	C	T	T	Mus musculus adaptor-related protein complex AP-4, epsilon 1 (Ap4e1), mRNA
Unigene20793_All	363	C	T	T	C	C	Xenopus (Silurana) tropicalis clone CH216-2G20, complete sequence
Unigene20907_All	879	T	G	G	T	T	Xenopus laevis farnesyltransferase, CAAX box, beta (fntb), mRNA >gi|51703712|gb|BC081217.1| Xenopus laevis MGC85220 protein, mRNA (cDNA clone MGC:85220 IMAGE:6871946), complete cds
Unigene20987_All	423	C	T	T	C	C	PREDICTED: Takifugu rubripes tissue factor pathway inhibitor-like (LOC101078065), mRNA
Unigene21579_All	560	C	C	C	T	T	Xenopus tropicalis finished cDNA, clone TGas136k01
Unigene21846_All	131	G	A	A	G	G	Xenopus tropicalis finished cDNA, clone TEgg011g10
Unigene22377_All	318	G	G	G	T	T	PREDICTED: Xenopus (Silurana) tropicalis latrophilin-2-like (LOC100494313), mRNA
Unigene22440_All	72	T	T	T	G	G	Rana catesbeiana fast troponin I (TnIf) gene, promoter region, exons 1, 2 and partial cds
Unigene22440_All	168	G	A	A	G	G	Rana catesbeiana fast troponin I (TnIf) gene, promoter region, exons 1, 2 and partial cds
Unigene22615_All	682	A	A	A	G	G	TSA: Anolis carolinensis k26:3073070 transcribed RNA sequence
Unigene25939_All	1600	G	G	G	A	A	Xenopus (Silurana) tropicalis isoleucyl-tRNA synthetase (iars), mRNA
Unigene26042_All	413	C	C	C	T	T	Rana rugosa mRNA for C2H2 zinc finger ddT, complete cds
Unigene26148_All	599	C	T	T	C	C	Xenopus laevis DDB1 and CUL4 associated factor 6 (dcaf6), mRNA
Unigene26155_All	743	T	C	C	T	T	Xenopus (Silurana) tropicalis eukaryotic translation initiation factor 2 alpha kinase 4 (eif2ak4), mRNA
Unigene26155_All	1028	G	A	A	G	G	Xenopus (Silurana) tropicalis eukaryotic translation initiation factor 2 alpha kinase 4 (eif2ak4), mRNA
Unigene26155_All	1409	T	C	C	T	T	Xenopus (Silurana) tropicalis eukaryotic translation initiation factor 2 alpha kinase 4 (eif2ak4), mRNA
Unigene26178_All	276	A	A	A	G	G	Xenopus laevis ATPase, class VI, type 11C (atp11c), mRNA >gi|32449678|gb|BC053328.1| Xenopus laevis ATPase, Class VI, type 11A, mRNA (cDNA clone MGC:53457 IMAGE:5572024), complete cds
Unigene26213_All	109	T	T	T	C	C	Xenopus (Silurana) tropicalis apoptosis enhancing nuclease (aen), mRNA
Unigene26357_All	356	C	C	C	T	T	Xenopus tropicalis finished cDNA, clone TNeu020l01
Unigene26375_All	870	C	C	C	T	T	Rana rugosa CYP17 mRNA for CYP17, partial cds
Unigene26375_All	953	C	C	C	T	T	Rana rugosa CYP17 mRNA for CYP17, partial cds
Unigene2656_All	451	A	A	A	G	G	Xenopus (Silurana) tropicalis jumonji domain-containing 3 histone lysine demethylase kdm6b (JMJD3) mRNA, complete cds
Unigene26974_All	211	G	A	A	G	G	Xenopus laevis AKT interacting protein (aktip-a), mRNA >gi|71682414|gb|BC100233.1| Xenopus laevis fused toes homolog (mouse), mRNA (cDNA clone MGC:115456 IMAGE:6325787), complete cds
Unigene26994_All	444	T	T	T	A	A	PREDICTED: Xenopus (Silurana) tropicalis neurofascin-like (LOC100485986), mRNA
Unigene26994_All	519	T	C	C	T	T	PREDICTED: Xenopus (Silurana) tropicalis neurofascin-like (LOC100485986), mRNA
Unigene27638_All	464	A	A	A	G	G	Xenopus laevis X-ray repair complementing defective repair in Chinese hamster cells 3 (xrcc3), mRNA
Unigene28889_All	210	C	C	C	T	T	Mus musculus chromosome 18, clone RP24-542P12, complete sequence
Unigene29394_All	248	T	T	T	A	A	Amolops tormotus clone Rato-8 microsatellite sequence
Unigene29425_All	79	A	A	A	G	G	PREDICTED: Taeniopygia guttata protein phosphatase 2, regulatory subunit B'', alpha (PPP2R3A), mRNA
Unigene30918_All	79	C	C	C	T	T	Xenopus laevis cDNA clone IMAGE:3399469
Unigene30918_All	89	G	G	G	A	A	Xenopus laevis cDNA clone IMAGE:3399469
Unigene31082_All	113	C	C	C	T	T	PREDICTED: Xenopus (Silurana) tropicalis UPF0493 protein KIAA1632-like (LOC100488260), mRNA
Unigene31289_All	31	C	C	C	T	T	PREDICTED: Xenopus (Silurana) tropicalis UPF0493 protein KIAA1632-like (LOC100488260), mRNA
Unigene31473_All	2984	T	T	T	C	C	Xenopus (Silurana) tropicalis ninein-like (ninl), mRNA >gi|134025601|gb|BC135980.1| Xenopus tropicalis ninein-like, mRNA (cDNA clone MGC:122323 IMAGE:7646186), complete cds
Unigene31473_All	3501	A	A	A	T	T	Xenopus (Silurana) tropicalis ninein-like (ninl), mRNA >gi|134025601|gb|BC135980.1| Xenopus tropicalis ninein-like, mRNA (cDNA clone MGC:122323 IMAGE:7646186), complete cds
Unigene31473_All	4337	C	C	C	T	T	Xenopus (Silurana) tropicalis ninein-like (ninl), mRNA >gi|134025601|gb|BC135980.1| Xenopus tropicalis ninein-like, mRNA (cDNA clone MGC:122323 IMAGE:7646186), complete cds
Unigene31473_All	4619	T	T	T	C	C	Xenopus (Silurana) tropicalis ninein-like (ninl), mRNA >gi|134025601|gb|BC135980.1| Xenopus tropicalis ninein-like, mRNA (cDNA clone MGC:122323 IMAGE:7646186), complete cds
Unigene31593_All	1299	T	T	T	C	C	PREDICTED: Xenopus (Silurana) tropicalis E1A binding protein p300 (ep300), mRNA
Unigene31724_All	143	A	A	A	G	G	Zebrafish DNA sequence from clone CH73-387G8 in linkage group 17, complete sequence
Unigene31767_All	1104	A	A	A	T	T	PREDICTED: Felis catus kinesin family member 1B, transcript variant 4 (KIF1B), mRNA
Unigene31852_All	1888	C	A	A	C	C	PREDICTED: Xenopus (Silurana) tropicalis leucine-rich repeats and immunoglobulin-like domains 3 (lrig3), mRNA
Unigene32178_All	257	G	G	G	A	A	Xenopus tropicalis TEA domain family member 1 (SV40 transcriptional enhancer factor), mRNA (cDNA clone IMAGE:7756437), partial cds
Unigene32826_All	612	T	A	A	T	T	Xenopus (Silurana) tropicalis leucine rich repeat containing 7 (lrrc7), mRNA >gi|114108004|gb|BC122962.1| Xenopus tropicalis densin-180, mRNA (cDNA clone MGC:145940 IMAGE:7662768), complete cds
Unigene3305_All	313	A	A	A	G	G	PREDICTED: Xenopus (Silurana) tropicalis f-box/WD repeat-containing protein 10-like (LOC100497591), mRNA
Unigene3313_All	113	A	A	A	G	G	PREDICTED: Xenopus (Silurana) tropicalis roundabout homolog 2-like (LOC100493913), mRNA
Unigene33200_All	719	T	T	T	A	A	Xenopus (Silurana) tropicalis SEC22 vesicle trafficking protein homolog B (sec22b), mRNA >gi|38494273|gb|BC061616.1| Xenopus tropicalis sec22l1 protein, mRNA (cDNA clone MGC:76190 IMAGE:5335844), complete cds
Unigene33200_All	740	A	A	A	G	G	Xenopus (Silurana) tropicalis SEC22 vesicle trafficking protein homolog B (sec22b), mRNA >gi|38494273|gb|BC061616.1| Xenopus tropicalis sec22l1 protein, mRNA (cDNA clone MGC:76190 IMAGE:5335844), complete cds
Unigene33200_All	1352	A	A	A	T	T	Xenopus (Silurana) tropicalis SEC22 vesicle trafficking protein homolog B (sec22b), mRNA >gi|38494273|gb|BC061616.1| Xenopus tropicalis sec22l1 protein, mRNA (cDNA clone MGC:76190 IMAGE:5335844), complete cds
Unigene33200_All	1366	T	T	T	C	C	Xenopus (Silurana) tropicalis SEC22 vesicle trafficking protein homolog B (sec22b), mRNA >gi|38494273|gb|BC061616.1| Xenopus tropicalis sec22l1 protein, mRNA (cDNA clone MGC:76190 IMAGE:5335844), complete cds
Unigene33432_All	679	A	A	A	G	G	Bombina orientalis DnaJC7 mRNA, complete cds
Unigene33775_All	223	A	A	A	G	G	R.catesbeiana gast gene, exon 1
Unigene33832_All	134	C	T	T	C	C	PREDICTED: Xenopus (Silurana) tropicalis transmembrane protein 2-like (LOC100491930), mRNA
Unigene33851_All	133	T	G	G	T	T	Oncorhynchus tshawytscha clone ChinookGH2 growth hormone 2 gene, complete cds; and skeletal muscle sodium channel alpha subunit-like, myosin alkali light chain-like, and microtubule-associated protein Tau-like genes, complete sequence
Unigene33994_All	163	A	T	T	A	A	Sus scrofa mRNA, clone: HTMT10041D11, expressed in hypothalamus
Unigene33994_All	315	C	T	T	C	C	Sus scrofa mRNA, clone: HTMT10041D11, expressed in hypothalamus
Unigene3464_All	298	T	C	C	T	T	Rana rugosa CYP19A1 gene for cytochrome P-450 aromatase, promoter region and partial cds
Unigene3582_All	161	A	G	G	A	A	PREDICTED: Xenopus (Silurana) tropicalis histone acetyltransferase KAT2A-like (LOC100492735), mRNA
Unigene37118_All	723	C	T	T	C	C	PREDICTED: Xenopus (Silurana) tropicalis f-box only protein 32-like (LOC100496585), mRNA
Unigene37135_All	2036	A	A	A	G	G	PREDICTED: Xenopus (Silurana) tropicalis retinoic acid-induced protein 1-like (LOC100487671), mRNA
Unigene37138_All	2444	T	T	T	G	G	Xenopus tropicalis SWAN ribonucleoprotein-like mRNA, complete sequence
Unigene37167_All	1141	A	A	A	G	G	PREDICTED: Xenopus (Silurana) tropicalis general transcription factor II-I repeat domain-containing protein 1-like (LOC100488034), mRNA
Unigene37214_All	307	G	G	G	A	A	PREDICTED: Meleagris gallopavo T-cell lymphoma invasion and metastasis 2 (TIAM2), mRNA
Unigene37231_All	1504	A	A	A	T	T	Xenopus (Silurana) tropicalis tuberous sclerosis 2 (tsc2), mRNA
Unigene37254_All	52	T	T	T	A	A	Rana nigromaculata clone rnh-1 microsatellite sequence
Unigene37279_All	885	T	C	C	T	T	PREDICTED: Sarcophilus harrisii myoferlin (MYOF), mRNA
Unigene37360_All	397	T	T	T	C	C	Xenopus (Silurana) tropicalis uncharacterized LOC100145743 (LOC100145743), mRNA
Unigene37474_All	140	G	A	A	G	G	PREDICTED: Felis catus zinc finger protein 420-like (LOC101099919), mRNA
Unigene37507_All	290	G	G	G	A	A	Mus musculus chromosome 1, clone RP23-65C14, complete sequence
Unigene37507_All	311	G	G	G	A	A	Mus musculus chromosome 1, clone RP23-65C14, complete sequence
Unigene37507_All	317	A	A	A	T	T	Mus musculus chromosome 1, clone RP23-65C14, complete sequence
Unigene37507_All	584	C	C	C	A	A	Mus musculus chromosome 1, clone RP23-65C14, complete sequence
Unigene37580_All	1469	G	A	A	G	G	PREDICTED: Xenopus (Silurana) tropicalis band 4.1-like protein 4B-like (LOC100488561), mRNA
Unigene37628_All	857	T	T	T	C	C	Oryzias latipes c-myc-like protein (c-myc20) mRNA, complete cds
Unigene37628_All	1095	G	A	A	G	G	Oryzias latipes c-myc-like protein (c-myc20) mRNA, complete cds
Unigene37963_All	197	G	A	A	G	G	PREDICTED: Felis catus zinc finger protein 674 (ZNF674), mRNA
Unigene37998_All	837	G	G	G	A	A	Xenopus laevis endoplasmic reticulum-Golgi intermediate compartment protein 3 (ergic3), mRNA >gi|51513378|gb|BC080394.1| Xenopus laevis MGC83277 protein, mRNA (cDNA clone MGC:83277 IMAGE:6862802), complete cds
Unigene38057_All	291	C	A	A	C	C	Xenopus (Silurana) tropicalis TBC1 domain family, member 9B (with GRAM domain) (tbc1d9b), mRNA
Unigene38070_All	1050	G	G	G	A	A	Xenopus laevis hypothetical protein LOC445860, mRNA (cDNA clone IMAGE:4405800), partial cds
Unigene38651_All	1019	A	G	G	A	A	PREDICTED: Oryctolagus cuniculus proteasome alpha 4 subunit-like (LOC100342159), mRNA
Unigene38918_All	226	G	G	G	A	A	PREDICTED: Xenopus (Silurana) tropicalis transformation/transcription domain-associated protein (trrap), mRNA
Unigene38926_All	309	A	A	A	G	G	PREDICTED: Xenopus (Silurana) tropicalis transmembrane protein 14A-like (LOC100496530), mRNA
Unigene39322_All	23	A	G	G	A	A	PREDICTED: Taeniopygia guttata huntingtin (HTT), mRNA
Unigene3974_All	167	T	T	T	C	C	PREDICTED: Xenopus (Silurana) tropicalis ubiquitin-conjugating enzyme E2Q-like protein CG4502-like (LOC100486993), mRNA
Unigene40460_All	99	G	G	G	A	A	Rana grahami bradykinin precursor, gene, complete cds
Unigene40636_All	117	C	C	C	T	T	PREDICTED: Xenopus (Silurana) tropicalis UPF0493 protein KIAA1632-like (LOC100488260), mRNA
Unigene40775_All	157	T	T	T	G	G	Schistosoma mansoni strain Puerto Rico chromosome 6, complete genome
Unigene40775_All	248	T	T	T	A	A	Schistosoma mansoni strain Puerto Rico chromosome 6, complete genome
Unigene42730_All	750	A	T	T	A	A	Xenopus (Silurana) tropicalis oxidation resistance 1 (oxr1), mRNA
Unigene42730_All	790	C	A	A	C	C	Xenopus (Silurana) tropicalis oxidation resistance 1 (oxr1), mRNA
Unigene42730_All	805	T	G	G	T	T	Xenopus (Silurana) tropicalis oxidation resistance 1 (oxr1), mRNA
Unigene42785_All	530	G	G	G	A	A	Xenopus (Silurana) tropicalis Sec23 homolog A (sec23a), mRNA >gi|116284095|gb|BC123946.1| Xenopus tropicalis Protein transport protein Sec23A, mRNA (cDNA clone MGC:146304 IMAGE:7691231), complete cds
Unigene42929_All	2075	A	A	A	G	G	Xenopus laevis endothelial PAS domain protein 1 (epas1), mRNA >gi|49118237|gb|BC073244.1| Xenopus laevis MGC80589 protein, mRNA (cDNA clone MGC:80589 IMAGE:5505727), complete cds
Unigene42966_All	1527	G	A	A	G	G	Homo sapiens unc-13 homolog A (C. elegans) (UNC13A), mRNA
Unigene43090_All	1377	C	T	T	C	C	Takifugu rubripes prominin-3 (LOC100653420), mRNA >gi|321171074|gb|HQ159407.1| Takifugu rubripes prominin-3 mRNA, complete cds, alternatively spliced
Unigene43090_All	1712	T	C	C	T	T	Takifugu rubripes prominin-3 (LOC100653420), mRNA >gi|321171074|gb|HQ159407.1| Takifugu rubripes prominin-3 mRNA, complete cds, alternatively spliced
Unigene43131_All	167	G	A	A	G	G	Xenopus (Silurana) tropicalis ilvB (bacterial acetolactate synthase)-like (ilvbl), mRNA
Unigene43172_All	457	T	C	C	T	T	Xenopus laevis RNA binding motif, single stranded interacting protein 1 (rbms1), mRNA >gi|27695125|gb|BC043623.1| Xenopus laevis RNA binding motif, single stranded interacting protein 1, mRNA (cDNA clone MGC:52966 IMAGE:4930516), complete cds
Unigene43172_All	922	C	T	T	C	C	Xenopus laevis RNA binding motif, single stranded interacting protein 1 (rbms1), mRNA >gi|27695125|gb|BC043623.1| Xenopus laevis RNA binding motif, single stranded interacting protein 1, mRNA (cDNA clone MGC:52966 IMAGE:4930516), complete cds
Unigene43571_All	846	A	A	A	G	G	PREDICTED: Cricetulus griseus neuron navigator 2-like, transcript variant 2 (LOC100760394), mRNA
Unigene43832_All	77	G	A	A	G	G	Oncorhynchus mykiss Onmy-LDA gene for MHC class I antigen, allele: Onmy-LDA*0101, and other genes, complete cds
Unigene43832_All	185	G	G	G	T	T	Oncorhynchus mykiss Onmy-LDA gene for MHC class I antigen, allele: Onmy-LDA*0101, and other genes, complete cds
Unigene43832_All	280	A	A	A	C	C	Oncorhynchus mykiss Onmy-LDA gene for MHC class I antigen, allele: Onmy-LDA*0101, and other genes, complete cds
Unigene43887_All	435	C	C	C	T	T	Xenopus laevis hypothetical protein LOC100137676, mRNA (cDNA clone IMAGE:5572436), partial cds
Unigene43910_All	731	C	T	T	C	C	PREDICTED: Xenopus (Silurana) tropicalis male-specific lethal 2 homolog (msl2), mRNA
Unigene43958_All	177	T	A	A	T	T	PREDICTED: Xenopus (Silurana) tropicalis GTP-binding protein GUF1 homolog (LOC100489624), mRNA
Unigene44380_All	1154	A	A	A	G	G	Xenopus (Silurana) tropicalis syntaxin 18 (stx18), mRNA >gi|77625843|emb|CR760125.2| Xenopus tropicalis finished cDNA, clone TNeu068e19
Unigene44380_All	1377	C	C	C	T	T	Xenopus (Silurana) tropicalis syntaxin 18 (stx18), mRNA >gi|77625843|emb|CR760125.2| Xenopus tropicalis finished cDNA, clone TNeu068e19
Unigene44426_All	140	G	G	G	T	T	PREDICTED: Canis lupus familiaris chromosome 9 open reading frame, human C17orf56 (C9H17orf56), mRNA
Unigene44426_All	185	G	G	G	A	A	PREDICTED: Canis lupus familiaris chromosome 9 open reading frame, human C17orf56 (C9H17orf56), mRNA
Unigene44626_All	755	G	A	A	G	G	Xenopus laevis MGC79131 protein (MGC79131), mRNA >gi|50603603|gb|BC077246.1| Xenopus laevis MGC79131 protein, mRNA (cDNA clone MGC:79131 IMAGE:5072990), complete cds
Unigene44979_All	221	G	A	A	G	G	Xenopus laevis copine III (cpne3), mRNA
Unigene4513_All	73	G	A	A	G	G	Xenopus (Silurana) tropicalis GSG1-like (gsg1l), mRNA >gi|134025690|gb|BC136169.1| Xenopus tropicalis Germ cell-specific gene 1-like protein, mRNA (cDNA clone MGC:122837 IMAGE:7663623), complete cds
Unigene45433_All	256	T	T	T	C	C	Homo sapiens BAC clone RP11-58H17 from chromosome x, complete sequence
Unigene45481_All	245	T	T	T	C	C	Rana latastei clone Ca27 microsatellite sequence
Unigene46633_All	191	G	A	A	G	G	PREDICTED: Xenopus (Silurana) tropicalis glucosidase, beta (bile acid) 2 (gba2), mRNA
Unigene46714_All	931	T	A	A	T	T	Pig DNA sequence from clone CH242-230G24 on chromosome X, complete sequence
Unigene4744_All	51	T	T	T	G	G	Xenopus laevis crystallin, zeta (quinone reductase)-like 1 (cryzl1), mRNA >gi|49114767|gb|BC072736.1| Xenopus laevis MGC79085 protein, mRNA (cDNA clone MGC:79085 IMAGE:5047345), complete cds
Unigene47521_All	111	T	C	C	T	T	PREDICTED: Nomascus leucogenys zinc finger protein 19 (ZNF19), mRNA
Unigene48330_All	104	T	C	C	T	T	Cyprinus carpio 5'-AMP-activated protein kinase subunit gamma-3 type II (PRKAG3II) gene, complete cds
Unigene48403_All	171	C	A	A	C	C	Meristogenys whiteheadi RH1 gene for rhodopsin, partial cds, specimen_voucher: UMS:BORNEENSIS 23010
Unigene48575_All	2422	T	T	T	C	C	Xenopus (Silurana) tropicalis adaptor-related protein complex 1, gamma 2 subunit (ap1g2), mRNA >gi|134025802|gb|BC135628.1| Xenopus tropicalis adaptor-related protein complex 1, gamma 1 subunit, mRNA (cDNA clone MGC:122095 IMAGE:7620301), complete cds
Unigene48575_All	2514	T	T	T	C	C	Xenopus (Silurana) tropicalis adaptor-related protein complex 1, gamma 2 subunit (ap1g2), mRNA >gi|134025802|gb|BC135628.1| Xenopus tropicalis adaptor-related protein complex 1, gamma 1 subunit, mRNA (cDNA clone MGC:122095 IMAGE:7620301), complete cds
Unigene48616_All	98	C	T	T	C	C	Xenopus laevis mediator complex subunit 24 (med24), mRNA >gi|27696899|gb|BC043802.1| Xenopus laevis thyroid hormone receptor-associated protein (100 kDa), mRNA (cDNA clone MGC:53083 IMAGE:5542207), complete cds
Unigene48616_All	224	A	G	G	A	A	Xenopus laevis mediator complex subunit 24 (med24), mRNA >gi|27696899|gb|BC043802.1| Xenopus laevis thyroid hormone receptor-associated protein (100 kDa), mRNA (cDNA clone MGC:53083 IMAGE:5542207), complete cds
Unigene48660_All	1146	C	C	C	T	T	Xenopus tropicalis finished cDNA, clone TNeu008b18
Unigene48736_All	1137	T	T	T	C	C	Xenopus (Silurana) tropicalis coiled-coil domain containing 81 (ccdc81), mRNA
Unigene48736_All	1808	T	T	T	C	C	Xenopus (Silurana) tropicalis coiled-coil domain containing 81 (ccdc81), mRNA
Unigene493_All	582	T	A	A	T	T	Xenopus tropicalis cDNA clone IMAGE:7624195
Unigene49510_All	1133	C	C	C	A	A	Xenopus laevis nuclear protein localization 4 homolog (nploc4), mRNA >gi|33585641|gb|BC056013.1| Xenopus laevis homolog of yeast nuclear protein localization 4, mRNA (cDNA clone MGC:68928 IMAGE:4957302), complete cds
Unigene49539_All	261	C	C	C	T	T	Xenopus laevis ganglioside induced differentiation associated protein 2 (gdap2), mRNA >gi|54038119|gb|BC084412.1| Xenopus laevis Ganglioside-induced differentiation-associated protein 2, mRNA (cDNA clone MGC:86296 IMAGE:7020596), complete cds
Unigene49539_All	848	G	A	A	G	G	Xenopus laevis ganglioside induced differentiation associated protein 2 (gdap2), mRNA >gi|54038119|gb|BC084412.1| Xenopus laevis Ganglioside-induced differentiation-associated protein 2, mRNA (cDNA clone MGC:86296 IMAGE:7020596), complete cds
Unigene49539_All	899	A	G	G	A	A	Xenopus laevis ganglioside induced differentiation associated protein 2 (gdap2), mRNA >gi|54038119|gb|BC084412.1| Xenopus laevis Ganglioside-induced differentiation-associated protein 2, mRNA (cDNA clone MGC:86296 IMAGE:7020596), complete cds
Unigene49539_All	947	A	G	G	A	A	Xenopus laevis ganglioside induced differentiation associated protein 2 (gdap2), mRNA >gi|54038119|gb|BC084412.1| Xenopus laevis Ganglioside-induced differentiation-associated protein 2, mRNA (cDNA clone MGC:86296 IMAGE:7020596), complete cds
Unigene49795_All	342	A	A	A	C	C	Xenopus tropicalis finished cDNA, clone TGas130k04
Unigene5021_All	28	G	G	G	A	A	Salmo salar clone 251P16 TCR-alpha/delta locus, genomic sequence
Unigene50467_All	160	T	C	C	T	T	Salmo salar DTSsa10 Tc1-like DNA transposon, complete sequence
Unigene50467_All	389	C	G	G	C	C	Salmo salar DTSsa10 Tc1-like DNA transposon, complete sequence
Unigene51140_All	78	G	G	G	A	A	Xenopus laevis peroxisomal biogenesis factor 16 (pex16), mRNA
Unigene53045_All	203	T	A	A	T	T	PREDICTED: Felis catus family with sequence similarity 126, member B (FAM126B), mRNA
Unigene53795_All	239	T	C	C	T	T	Homo sapiens FOSMID clone ABC14-50144500I9 from chromosome 22, complete sequence
Unigene542_All	1509	A	A	A	G	G	Sus scrofa mRNA, clone: PBL010103F11, expressed in peripheral blood lymphocytes
Unigene542_All	1953	A	A	A	G	G	Sus scrofa mRNA, clone: PBL010103F11, expressed in peripheral blood lymphocytes
Unigene542_All	2067	A	A	A	G	G	Sus scrofa mRNA, clone: PBL010103F11, expressed in peripheral blood lymphocytes
Unigene542_All	2109	C	A	A	C	C	Sus scrofa mRNA, clone: PBL010103F11, expressed in peripheral blood lymphocytes
Unigene54270_All	174	A	G	G	A	A	Xenopus (Silurana) tropicalis chordin-like 1 (chrdl1), mRNA
Unigene54270_All	323	T	A	A	T	T	Xenopus (Silurana) tropicalis chordin-like 1 (chrdl1), mRNA
Unigene54288_All	911	C	C	C	T	T	PREDICTED: Xenopus (Silurana) tropicalis AP-4 complex subunit epsilon-1-like (LOC100494908), mRNA
Unigene54393_All	1000	T	T	T	A	A	Mus musculus 10 BAC RP23-158C15 (Roswell Park Cancer Institute (C57BL/6J Female) Mouse BAC Library) complete sequence
Unigene54483_All	136	T	T	T	A	A	Xenopus tropicalis fer-1-like 3, myoferlin, mRNA (cDNA clone IMAGE:7871212), partial cds
Unigene54483_All	1409	A	G	G	A	A	Xenopus tropicalis fer-1-like 3, myoferlin, mRNA (cDNA clone IMAGE:7871212), partial cds
Unigene54538_All	857	G	G	G	A	A	TSA: Anolis carolinensis comp185_c0_seq1 transcribed RNA sequence
Unigene54646_All	745	A	G	G	A	A	PREDICTED: Xenopus (Silurana) tropicalis transmembrane protein 43-like (LOC100495534), mRNA
Unigene54663_All	1647	G	A	A	G	G	Xenopus (Silurana) tropicalis core-binding factor, runt domain, alpha subunit 2; translocated to, 2 (cbfa2t2), mRNA >gi|134025483|gb|BC135600.1| Xenopus tropicalis core-binding factor, runt domain, alpha subunit 2; translocated to, 2, mRNA (cDNA clone MGC:121424 IMAGE:7609672), complete cds
Unigene54681_All	157	A	A	A	G	G	Rana rugosa got1 gene for glutamate oxaloacetate transaminase, partial cds
Unigene54945_All	329	G	G	G	A	A	Rana temporaria microsatellite BFG031 sequence
Unigene55011_All	230	C	C	C	T	T	Xenopus tropicalis finished cDNA, clone TTpA018b06
Unigene55269_All	535	T	T	T	C	C	Xenopus (Silurana) tropicalis ST3 beta-galactoside alpha-2,3-sialyltransferase 2, gene 2 (st3gal2.2), mRNA >gi|37652854|emb|AJ585763.1| Silurana tropicalis mRNA for alpha2,3-sialyltransferase (st3Gal-II gene)
Unigene55360_All	81	T	T	T	C	C	Xenopus (Silurana) tropicalis mitogen-activated protein kinase-activated protein kinase 3 (mapkapk3), mRNA >gi|114107750|gb|BC123094.1| Xenopus tropicalis mitogen-activated protein kinase-activated protein kinase 3, mRNA (cDNA clone MGC:147354 IMAGE:7873918), complete cds
Unigene55360_All	859	G	G	G	A	A	Xenopus (Silurana) tropicalis mitogen-activated protein kinase-activated protein kinase 3 (mapkapk3), mRNA >gi|114107750|gb|BC123094.1| Xenopus tropicalis mitogen-activated protein kinase-activated protein kinase 3, mRNA (cDNA clone MGC:147354 IMAGE:7873918), complete cds
Unigene55436_All	416	T	C	C	T	T	Xenopus laevis transmembrane 9 superfamily member 2 (tm9sf2), mRNA
Unigene55538_All	305	A	A	A	G	G	PREDICTED: Xenopus (Silurana) tropicalis protein KIAA1199-like (LOC100492102), mRNA
Unigene55914_All	675	T	C	C	T	T	PREDICTED: Xenopus (Silurana) tropicalis cytoplasmic polyadenylation element-binding protein 4-like (LOC100489114), mRNA
Unigene55914_All	730	G	A	A	G	G	PREDICTED: Xenopus (Silurana) tropicalis cytoplasmic polyadenylation element-binding protein 4-like (LOC100489114), mRNA
Unigene56000_All	439	C	T	T	C	C	PREDICTED: Gallus gallus HEAT repeat containing 5B (HEATR5B), mRNA
Unigene56055_All	108	C	C	C	T	T	Rana grahami bradykinin precursor, gene, complete cds
Unigene5853_All	277	C	T	T	C	C	PREDICTED: Xenopus (Silurana) tropicalis KIAA0831 (kiaa0831), mRNA
Unigene59571_All	78	G	T	T	G	G	Meristogenys stigmachilus RH1 gene for rhodopsin, partial cds, specimen_voucher: UMS:BORNEENSIS 12561
Unigene5961_All	102	A	G	G	A	A	Xenopus laevis glucosamine (N-acetyl)-6-sulfatase (gns), mRNA >gi|27503349|gb|BC042274.1| Xenopus laevis glucosamine (N-acetyl)-6-sulfatase (Sanfilippo disease IIID), mRNA (cDNA clone MGC:53439 IMAGE:5571900), complete cds
Unigene59783_All	210	T	T	T	A	A	Xenopus laevis ATP-binding cassette, sub-family G (WHITE), member 2 (abcg2), mRNA
Unigene59792_All	177	C	G	G	C	C	Xenopus (Silurana) tropicalis fatty acyl CoA reductase 1 (far1), mRNA
Unigene59795_All	1611	T	T	T	A	A	PREDICTED: Xenopus (Silurana) tropicalis alpha-1,3-mannosyl-glycoprotein 4-beta-N-acetylglucosaminyltransferase B-like (LOC100489322), mRNA
Unigene59795_All	2170	T	A	A	T	T	PREDICTED: Xenopus (Silurana) tropicalis alpha-1,3-mannosyl-glycoprotein 4-beta-N-acetylglucosaminyltransferase B-like (LOC100489322), mRNA
Unigene59869_All	2081	T	T	T	C	C	Xenopus laevis similar to adaptor protein complex AP-1, gamma 1 subunit, mRNA (cDNA clone IMAGE:5542066), partial cds
Unigene59887_All	132	A	A	A	G	G	PREDICTED: Xenopus (Silurana) tropicalis hypothetical protein LOC100145763 (LOC100145763), mRNA
Unigene59969_All	280	C	C	C	T	T	Mus musculus chromosome 1, clone RP24-538F21, complete sequence
Unigene60096_All	1833	A	C	C	A	A	Xenopus (Silurana) tropicalis inositol-trisphosphate 3-kinase C (itpkc), mRNA
Unigene6069_All	461	A	G	G	A	A	Xenopus (Silurana) tropicalis Rho GTPase activating protein 33 (arhgap33), mRNA >gi|126632052|gb|BC133722.1| Xenopus tropicalis sorting nexin 26, mRNA (cDNA clone MGC:145838 IMAGE:7650730), complete cds
Unigene6069_All	857	T	C	C	T	T	Xenopus (Silurana) tropicalis Rho GTPase activating protein 33 (arhgap33), mRNA >gi|126632052|gb|BC133722.1| Xenopus tropicalis sorting nexin 26, mRNA (cDNA clone MGC:145838 IMAGE:7650730), complete cds
Unigene6069_All	947	G	T	T	G	G	Xenopus (Silurana) tropicalis Rho GTPase activating protein 33 (arhgap33), mRNA >gi|126632052|gb|BC133722.1| Xenopus tropicalis sorting nexin 26, mRNA (cDNA clone MGC:145838 IMAGE:7650730), complete cds
Unigene61222_All	62	T	T	T	A	A	Xenopus laevis ubiquinol-cytochrome c reductase core protein I (uqcrc1), nuclear gene encoding mitochondrial protein, mRNA >gi|29351606|gb|BC049288.1| Xenopus laevis ubiquinol-cytochrome c reductase core protein I, mRNA (cDNA clone MGC:53748 IMAGE:4930733), complete cds
Unigene61439_All	176	A	G	G	A	A	Xenopus laevis X-ray repair complementing defective repair in Chinese hamster cells 3 (xrcc3), mRNA
Unigene61465_All	249	T	C	C	T	T	Xenopus (Silurana) tropicalis UTP23, small subunit (SSU) processome component, homolog (utp23), mRNA >gi|77624215|emb|CR942499.2| Xenopus tropicalis finished cDNA, clone TEgg016n21
Unigene61530_All	169	G	C	C	G	G	Xenopus laevis mitochondrial pyruvate carrier 2 (mpc2), nuclear gene encoding mitochondrial protein, mRNA
Unigene61699_All	256	G	G	G	T	T	Xenopus (Silurana) tropicalis myoferlin (myof), mRNA >gi|189441667|gb|BC167451.1| Xenopus tropicalis fer-1-like 3, myoferlin, mRNA (cDNA clone MGC:172384 IMAGE:7685141), complete cds
Unigene6175_All	370	G	G	G	T	T	Rana hubeiensis clone Pehu-1 microsatellite sequence
Unigene6175_All	1774	A	A	A	C	C	Rana hubeiensis clone Pehu-1 microsatellite sequence
Unigene6268_All	946	A	A	A	G	G	Homo sapiens BAC clone RP11-470O21 from 2, complete sequence
Unigene6320_All	139	C	T	T	C	C	Rana lessonae microsatellite RlCa18 sequence
Unigene6320_All	176	A	G	G	A	A	Rana lessonae microsatellite RlCa18 sequence
Unigene6394_All	151	C	C	C	A	A	Rana latastei clone Ca27 microsatellite sequence
Unigene64951_All	139	G	A	A	G	G	Rana catesbeiana cardiac troponin I (TnIc) gene, promoter region, 5' UTR, and exon 1
Unigene67759_All	87	G	A	A	G	G	Salmo salar clone 272P16 chaperonin gene, complete cds; myosin 1 gene, partial cds; and TCR-gamma locus, partial sequence
Unigene67759_All	95	C	T	T	C	C	Salmo salar clone 272P16 chaperonin gene, complete cds; myosin 1 gene, partial cds; and TCR-gamma locus, partial sequence
Unigene6877_All	40	A	A	A	G	G	TSA: Anolis carolinensis comp27_c4_seq2 transcribed RNA sequence
Unigene6877_All	50	G	G	G	C	C	TSA: Anolis carolinensis comp27_c4_seq2 transcribed RNA sequence
Unigene6877_All	74	A	A	A	C	C	TSA: Anolis carolinensis comp27_c4_seq2 transcribed RNA sequence
Unigene6877_All	107	T	T	T	C	C	TSA: Anolis carolinensis comp27_c4_seq2 transcribed RNA sequence
Unigene6877_All	364	C	T	T	C	C	TSA: Anolis carolinensis comp27_c4_seq2 transcribed RNA sequence
Unigene6877_All	542	A	A	A	G	G	TSA: Anolis carolinensis comp27_c4_seq2 transcribed RNA sequence
Unigene7012_All	1635	T	A	A	T	T	Xenopus laevis eukaryotic translation initiation factor 3, subunit I (eif3i), mRNA >gi|51703889|gb|BC081058.1| Xenopus laevis eukaryotic translation initiation factor 3, subunit 2 beta, mRNA (cDNA clone MGC:81903 IMAGE:7009114), complete cds
Unigene7038_All	695	T	C	C	T	T	PREDICTED: Xenopus (Silurana) tropicalis histone acetyltransferase KAT2A-like (LOC100492735), mRNA
Unigene7038_All	1220	T	T	T	C	C	PREDICTED: Xenopus (Silurana) tropicalis histone acetyltransferase KAT2A-like (LOC100492735), mRNA
Unigene7189_All	1175	T	T	T	G	G	Xenopus laevis actin-like 6A (actl6a), mRNA >gi|27882019|gb|BC043771.1| Xenopus laevis actin-related protein, mRNA (cDNA clone MGC:52964 IMAGE:4930484), complete cds
Unigene7263_All	954	C	C	C	T	T	Xenopus laevis ring finger protein 157 (rnf157), mRNA
Unigene74644_All	131	G	G	G	A	A	PREDICTED: Xenopus (Silurana) tropicalis protein TANC2-like (LOC100485280), mRNA
Unigene7588_All	3053	T	C	C	T	T	Rana chensinensis clone RCMS001 microsatellite sequence
Unigene7588_All	3424	T	A	A	T	T	Rana chensinensis clone RCMS001 microsatellite sequence
Unigene8171_All	2368	C	C	C	G	G	Rana rugosa got1 gene for glutamate oxaloacetate transaminase, partial cds
Unigene8171_All	2425	T	T	T	C	C	Rana rugosa got1 gene for glutamate oxaloacetate transaminase, partial cds
Unigene819_All	906	T	T	T	G	G	PREDICTED: Monodelphis domestica cytoplasmic dynein 2 light intermediate chain 1-like (LOC100033374), mRNA
Unigene8404_All	80	G	C	C	G	G	Danio rerio cornichon homolog (Drosophila) (cnih), mRNA >gi|72679399|gb|BC100049.1| Danio rerio cornichon homolog (Drosophila), mRNA (cDNA clone MGC:112228 IMAGE:3819123), complete cds
Unigene864_All	1376	C	T	T	C	C	PREDICTED: Ailuropoda melanoleuca uncharacterized protein C20orf4 homolog (LOC100465061), mRNA
Unigene864_All	1557	A	G	G	A	A	PREDICTED: Ailuropoda melanoleuca uncharacterized protein C20orf4 homolog (LOC100465061), mRNA
Unigene8722_All	3842	C	C	C	A	A	PREDICTED: Ornithorhynchus anatinus neurobeachin (NBEA), mRNA
Unigene8778_All	38	A	A	A	G	G	Rana rugosa gaegurin 4 (GGN4) gene, complete cds
Unigene886_All	437	A	A	A	G	G	Xenopus (Silurana) tropicalis family with sequence similarity 134, member B (fam134b), mRNA
Unigene8929_All	110	C	C	C	A	A	Pig DNA sequence from clone CH242-445N23 on chromosome X, complete sequence
Unigene90044_All	172	G	A	A	G	G	Rana rugosa CYP19A1 gene for cytochrome P-450 aromatase, promoter region and partial cds
Unigene9026_All	774	G	C	C	G	G	Cyprinus carpio clone 533472 microsatellite sequence
Unigene9026_All	1941	T	T	T	G	G	Cyprinus carpio clone 533472 microsatellite sequence
Unigene9026_All	2212	G	G	G	A	A	Cyprinus carpio clone 533472 microsatellite sequence
Unigene9108_All	307	A	A	A	C	C	PREDICTED: Xenopus (Silurana) tropicalis ubiquitin conjugation factor E4 B-like (LOC100491174), mRNA
Unigene9171_All	535	C	C	C	T	T	Rana rugosa gaegurin 4 (GGN4) gene, complete cds
Unigene9180_All	1401	T	G	G	T	T	Cyprinus carpio clone 533472 microsatellite sequence
Unigene92928_All	231	T	C	C	T	T	PREDICTED: Ornithorhynchus anatinus protein EMSY-like (LOC100086428), partial mRNA
Unigene92928_All	348	T	C	C	T	T	PREDICTED: Ornithorhynchus anatinus protein EMSY-like (LOC100086428), partial mRNA
Unigene9535_All	358	T	A	A	T	T	Rana catesbeiana smooth muscle alpha actin gene, complete cds
Unigene9535_All	372	C	G	G	C	C	Rana catesbeiana smooth muscle alpha actin gene, complete cds
Unigene9535_All	484	G	T	T	G	G	Rana catesbeiana smooth muscle alpha actin gene, complete cds
Unigene9853_All	1921	C	C	C	T	T	Rana grahami bradykinin precursor, gene, complete cds
Unigene9853_All	2208	T	C	C	T	T	Rana grahami bradykinin precursor, gene, complete cds
